# Supplementary material for: The Origin Recognition Complex Interacts with a Subset of Metabolic Genes Tightly Linked to Origins of Replication
Source: PubMed Central journal article supplement (PMC2778871; doi:10.1371/journal.pgen.1000755), 2009-12-04
Supplement: pgen.1000755.s001.pdf [file pgen.1000755.s001.pdf]

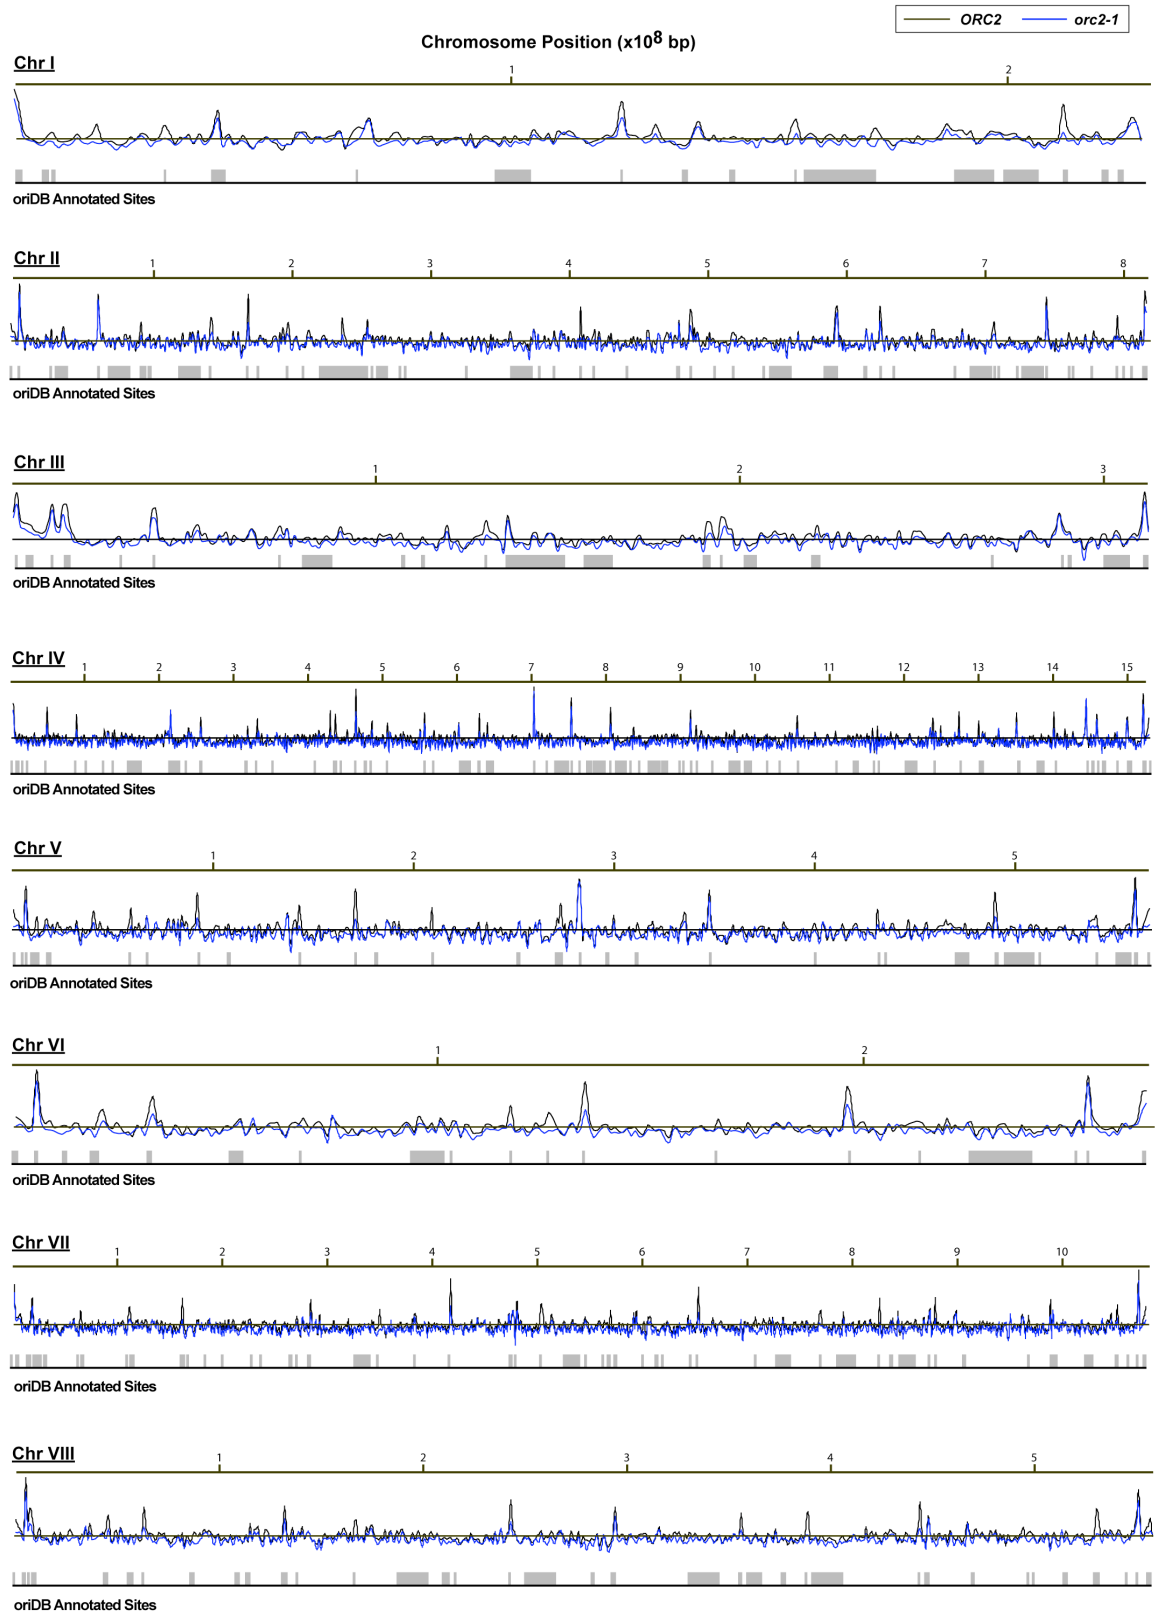

**Chr IX**

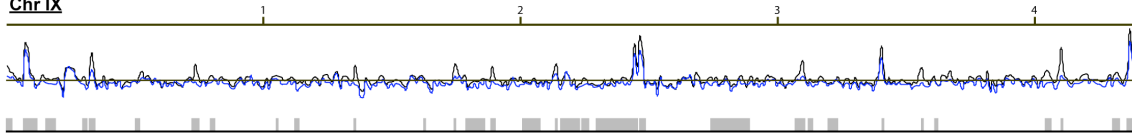

oriDB Annotated Sites

**Chr X**

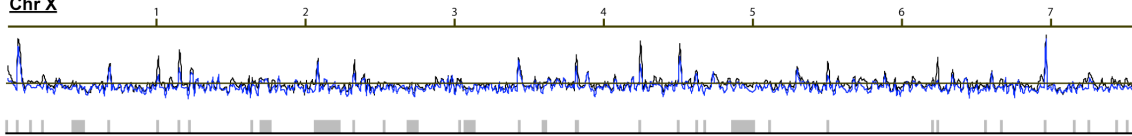

oriDB Annotated Sites

**Chr XI**

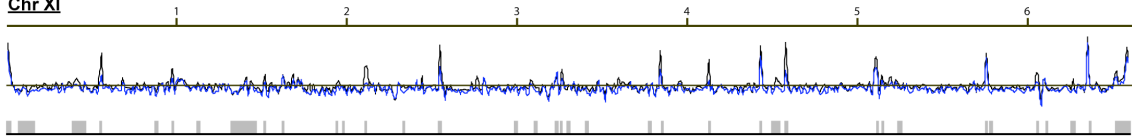

oriDB Annotated Sites

**Chr XII**

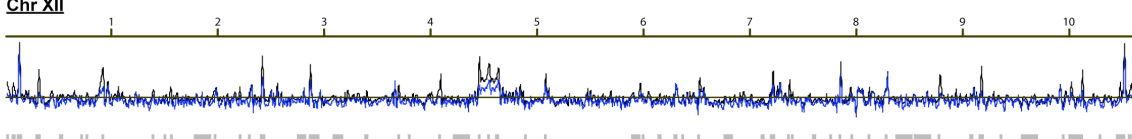

oriDB Annotated Sites

**Chr XIII**

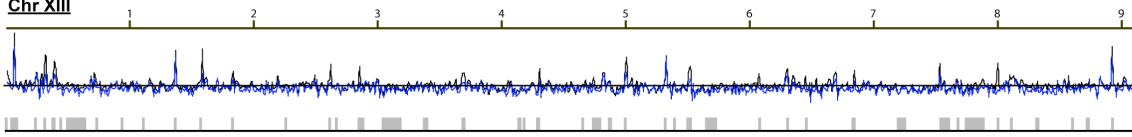

oriDB Annotated Sites

**Chr XIV**

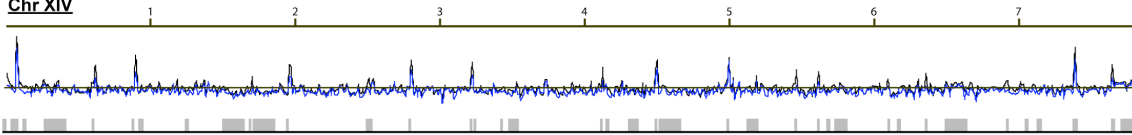

oriDB Annotated Sites

**Chr XV**

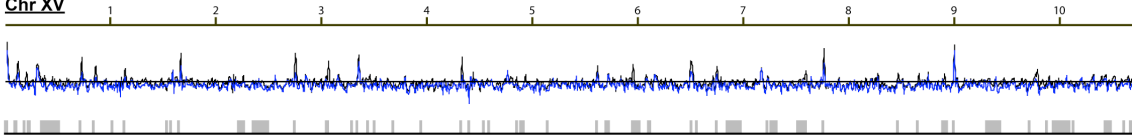

oriDB Annotated Sites

**Chr XVI**

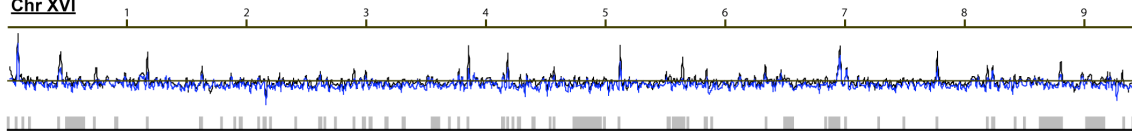

oriDB Annotated Sites
