# Supplementary material for: The Origin Recognition Complex Interacts with a Subset of Metabolic Genes Tightly Linked to Origins of Replication
Source: PLoS Genet. 2009 Dec 4;5(12):e1000755. doi: 10.1371/journal.pgen.1000755 (PMC2778871; doi:10.1371/journal.pgen.1000755)
Supplement: Table S1 — ChIP-on-chip overview. (0.18 MB XLS) [file pgen.1000755.s005.xls]

## Sheet: Sheet1
Chromosome	Start	End	p-value	WT Peak area	orc2-1/WT ratio	oriDB_Start	oriDB_End	oriDB_Status	oriDB_Name	oriDB_Other name(s)
1	200	2800	0	109.95	0.827853	650	1791	Confirmed ARS	ARS102	proARS102
1	7800	8600	1.12177e-36	10.31	0.354995	7998	8548	Confirmed ARS	ARS103	proARS103
1	16600	17700	5.98332e-95	22.55	0.0759426
1	30400	31400	6.1758e-130	22.06	0.481868	30946	31184	Confirmed ARS	ARS104	proARS104
1	35400	36300	1.16284e-20	10.96	0.99125
1	41100	42800	4.672e-254	48.31	0.884703	40716	43300	Confirmed ARS	ARS105	proARS105
1	57900	58500	9.31056e-26	7.52	0.868546
1	70100	71000	1.8152e-273	33.17	0.588785	70258	70491	Confirmed ARS	ARS106	proARS106
1	71800	73600	2.0458e-106	43.44	1.14198
1	106400	107500	1.27153e-24	14.64	0.878415
1	113500	114600	5.39415e-27	14.5849	0.870762
1	123000	125700	0	65.48	0.742448	124350	124599	Confirmed ARS	ARS107	proARS107
1	129700	130400	6.45693e-27	10.08	0.764881
1	131100	132200	1.31129e-55	18.9754	0.728028
1	139200	141400	1.13736e-60	41.09	0.9846
1	142500	143300	4.53991e-35	12.24	1.22141
1	159000	160400	4.3517e-294	42.61	0.402018	159906	160127	Confirmed ARS	ARS109	ARS101, proARS109
1	176000	177100	5.72243e-54	17.9787	0.294983	176154	176402	Confirmed ARS	ARS110	ADE1
1	190400	192300	1.08167e-63	32.0167	0.859837
1	192800	194300	3.77949e-25	19.76	0.672442	192666	200666	Dubious ARS
1	214400	215900	0	54.64	0.306188	214879	215635	Confirmed ARS	ARS111	proARS111
1	227700	230100	9.0649e-130	56.27	1.05438
2	200	3000	1.46198e-56	38.5702	0.715923	39	686	Confirmed ARS	ARS200
2	5800	9000	0	120.13	0.903357	6123	7127	Confirmed ARS	ARS201	proARS201
2	28900	29500	2.14664e-44	11.57	0.522475	28933	29152	Confirmed ARS	ARS201.5	ARS230
2	37200	39000	3.42423e-45	31.87	0.91613	33000	41000	Dubious ARS
2	62600	64100	0	81.8	0.997433	63186	63421	Confirmed ARS	ARS202	proARS202
2	92900	94100	4.7834e-127	30.51	0.44805	93410	93811	Confirmed ARS	ARS203	proARS203
2	143200	144700	8.4387e-265	51.84	0.546516	142868	144016	Confirmed ARS	ARS206	proARS206
2	158900	159500	3.33514e-27	9.54	0.86478
2	163100	163900	4.86893e-22	11.88	1.0766
2	169300	171000	0	68.52	0.45149	170049	170298	Confirmed ARS	ARS207	proARS207
2	192900	193500	7.07749e-23	8.92	0.734305
2	194500	195700	5.35523e-25	18.58	0.672168
2	198000	199100	4.7357e-152	31.26	0.523672	198193	198434	Confirmed ARS	ARS207.5	ARS231
2	212700	214200	6.25666e-25	21.834	0.779519
2	237400	238500	9.7016e-244	37.18	0.459224	237644	237879	Confirmed ARS	ARS208	proARS208
2	254700	255800	3.8557e-154	31.88	0.795169	254890	255136	Confirmed ARS	ARS209	ARSH4, proARS209
2	300400	301300	2.41224e-20	12.7	1.1315
2	373900	375700	2.69904e-22	26.39	1.22357
2	394100	394800	9.96642e-25	10.66	1.27111
2	407600	408700	0	44.47	0.198336	407831	408064	Confirmed ARS	ARS214	proARS214
2	417400	418400	4.29029e-34	17.5701	0.340167	417739	418035	Confirmed ARS	ARS215	proARS215
2	455700	457300	4.72258e-28	22.37	0.715197
2	477800	479200	3.99262e-66	33.7	1.03027	477783	479267	Likely ARS
2	486200	488200	0	74.08	0.523098	486661	486909	Confirmed ARS	ARS216	proARS216
2	489000	490300	1.02999e-26	18.94	0.73837
2	589700	592500	0	99.6	0.753815	591424	591713	Confirmed ARS	ARS219	proARS219
2	612300	613200	1.79274e-25	14.36	1.27368	611269	613200	Confirmed ARS	ARS219.5
2	621600	623600	0	70.16	0.646237	622625	622894	Confirmed ARS	ARS220	proARS220
2	702600	704800	5.8196e-121	45.0439	0.658422	704250	704521	Confirmed ARS	ARS222	proARS222
2	741100	742700	0	73.54	0.843215	741512	741802	Confirmed ARS	ARS224	proARS224
2	757400	758200	2.39035e-29	12.57	0.608797	757390	757621	Confirmed ARS	ARS225	proARS225
2	791800	792800	1.1388e-215	31.81	0.350986	792116	792340	Confirmed ARS	ARS228	proARS228
2	808800	809500	2.00726e-22	9.87	0.715351
2	811500	813100	0	93.24	0.809309	810493	813067	Dubious ARS
3	300	8500	0	202.44	0.872596	837	1551	Confirmed ARS	ARS300	X-ARS, proARS300
3	9400	17000	0	214.44	0.792691	11145	11401	Confirmed ARS	ARS301	proARS301
3	38900	40900	0	77.61	0.825756	39158	39706	Confirmed ARS	ARS305	ARS A6C, proARS305
3	50900	52600	2.50187e-54	31.44	0.864316
3	62200	62900	3.42538e-21	8.95058	0.789307
3	66100	68200	1.4262e-23	26.73	1.24429
3	74200	75100	1.01727e-84	20.77	0.535388	74457	74677	Confirmed ARS	ARS306
3	76100	77200	2.49588e-35	16.53	1.19843
3	91400	92600	1.7995e-39	18.99	0.90416
3	120800	122300	5.58385e-38	24.94	0.771711
3	131700	133500	2.6731e-142	39.52	0.438355	131978	132322	Confirmed ARS	ARS309	proARS309
3	137800	139400	9.8873e-102	38.18	0.963332	137843	138897	Dubious ARS
3	193800	195900	7.7636e-177	46.4264	0.498244	194256	194505	Confirmed ARS	ARS313
3	197300	198400	4.9376e-192	30.8	0.330805	197369	197601	Confirmed ARS	ARS314	proARS314
3	198500	201300	1.3067e-131	51.77	0.867074
3	224300	225300	5.40764e-49	16.85	0.659347	224807	225053	Confirmed ARS	ARS315
3	247400	248000	8.53617e-21	7.23	1.07469
3	251100	252600	2.70438e-39	19.45	0.828504
3	291000	293900	5.9264e-235	64.22	1.01439	292524	292826	Confirmed ARS	ARS317	proARS317
3	307500	308300	3.0171e-27	10.83	0.951144	304363	311363	Likely ARS
3	314500	316500	0	80.4	0.865869	315346	316232	Confirmed ARS	ARS319	X-ARS
4	200	2000	0	95.25	0.798547	137	1392	Confirmed ARS	ARS400
4	3000	3600	6.39353e-23	8.95504	0.885535
4	45200	47700	2.9449e-274	65.67	0.57643	46181	46237	Confirmed ARS	ARS404	HO, proARS404
4	85500	86900	1.3173e-220	44.47	0.522671	85945	86177	Confirmed ARS	ARS405	proARS405
4	123600	124500	3.21162e-29	13.95	0.409319	123617	123902	Confirmed ARS	ARS406	proARS406
4	127500	128700	1.95933e-29	17.39	1.0253
4	136700	137700	2.31747e-20	13.9	0.478182	137003	138437	Likely ARS		proARS407
4	212100	213100	0	46.07	1.10245	212420	212669	Confirmed ARS	ARS409	proARS409
4	236300	238400	1.29802e-25	31.0096	0.808902	235363	236487	Likely ARS
4	252900	254400	5.3728e-180	39.05	0.745455	253789	254038	Confirmed ARS	ARS410	proARS410
4	316600	317400	2.80939e-67	17.04	0.528756	315773	318097	Likely ARS		proARS412
4	328800	330400	1.97734e-97	42.05	0.439488	329564	329813	Confirmed ARS	ARS413	proARS413
4	412100	413300	5.36261e-37	20.9789	0.989091
4	427200	428600	1.7758e-256	51.27	0.276185
4	434600	436200	1.3454e-217	45.84	0.324596	434223	437917	Likely ARS		proARS415
4	462000	464700	0	95.06	0.551039	462430	462700	Confirmed ARS	ARS416	ARS1, proARS416
4	483500	485100	3.2227e-139	41.29	0.665294	483846	484091	Confirmed ARS	ARS417	proARS417
4	505200	506000	8.2445e-106	22.43	0.566168	505336	505578	Confirmed ARS	ARS417.5	ARS450
4	508400	509400	9.97244e-21	13.37	1.27599
4	548900	550300	4.58142e-32	20.15	1.32258
4	554700	556500	0	67.39	0.76406	555224	555461	Confirmed ARS	ARS418	proARS418
4	567300	568100	4.07385e-33	13.39	0.305539	567490	567737	Confirmed ARS	ARS419	proARS419
4	600800	602300	1.29934e-52	31.33	1.11203
4	628800	629900	4.3664e-211	37.88	0.431239	628203	630547	Likely ARS		proARS420
4	639600	640900	4.98158e-82	27.32	0.49356	639859	640108	Confirmed ARS	ARS421	proARS421
4	702200	703900	0	89.59	1.0029	702879	703125	Confirmed ARS	ARS422	ARO1, proARS422
4	720800	721500	2.44119e-39	13.95	0.8	719873	721227	Likely ARS
4	752600	754700	0	82.81	0.871634	753159	753391	Confirmed ARS	ARS423	proARS423
4	805500	807600	0	57.01	0.675496	806044	806270	Confirmed ARS	ARS425	proARS425
4	836600	838100	2.8928e-35	26.26	0.599541
4	913100	914700	2.7026e-285	50.4065	0.830541	913780	914029	Confirmed ARS	ARS428	proARS428
4	921300	922300	4.16e-104	23.54	0.205503	921682	921930	Confirmed ARS	ARS429	proARS429
4	1016600	1017300	6.96757e-31	11.73	0.755328	1016624	1016922	Confirmed ARS	ARS430	proARS430
4	1056700	1058600	3.8148e-145	48.35	0.696318	1057828	1058076	Confirmed ARS	ARS431	proARS431
4	1159000	1159800	1.2304e-37	14.01	0.461314	1159250	1159499	Confirmed ARS	ARS432	proARS432
4	1165700	1166500	2.5379e-63	17.04	0.437656	1165998	1166221	Confirmed ARS	ARS432.5	ARS453
4	1236600	1238100	5.76899e-33	24.74	1.24778
4	1240300	1241800	1.8406e-255	45.63	0.550159	1240869	1241098	Confirmed ARS	ARS433	proARS433
4	1251000	1251800	1.48123e-53	17.72	0.682109
4	1275600	1277000	1.7493e-239	43.47	0.444154	1276212	1276440	Confirmed ARS	ARS434	proARS434
4	1302300	1303300	6.4992e-146	28.92	0.288036	1302579	1302819	Confirmed ARS	ARS435	proARS435
4	1329100	1330200	2.63053e-23	16.04	1.26372
4	1353000	1354200	3.395e-212	38.03	0.809624	1353494	1353667	Confirmed ARS	ARS437	proARS437
4	1403600	1405000	2.577e-192	44.75	0.451869	1404277	1404512	Confirmed ARS	ARS440	proARS440
4	1445900	1448200	0	98.7	1.08609	1447298	1448928	Confirmed ARS	ARS441	proARS441
4	1461500	1463000	0	54.74	0.862075	1461849	1462161	Confirmed ARS	ARS442	proARS443
4	1486700	1487400	1.07521e-23	10.77	0.293678	1486905	1487149	Confirmed ARS	ARS446	proARS446
4	1489400	1489900	2.31061e-29	9.05	1.23757
4	1502400	1504300	0	64.79	0.839275	1501448	1504702	Likely ARS		proARS447
4	1522700	1525500	0	113.23	0.879714	1522298	1526152	Likely ARS		proARS449
4	1529700	1531800	5.64779e-47	32.18	0.59504	1530848	1531802	Dubious ARS
5	200	2600	1.31478e-50	35.1358	0.626796	23	1144	Dubious ARS
5	6200	7500	0	56.54	0.761585	6464	7230	Confirmed ARS	ARS503	proARS503
5	11700	12500	1.01263e-66	17.2744	0.0341546	10425	12929	Likely ARS		proARS504
5	16400	17900	2.2666e-21	18.78	0.793857	17067	19023	Likely ARS		proARS506
5	40200	41900	2.36901e-43	32.31	0.649144
5	59200	60500	2.1811e-115	31.65	0.385829	59282	59516	Confirmed ARS	ARS507	proARS507
5	63800	64200	1.79646e-20	6.22518	0.530812
5	67200	68700	2.1876e-25	21.75	1.2	67665	68709	Dubious ARS
5	78300	79700	4.41589e-23	16.62	1.11702
5	85600	86600	1.02388e-40	18.57	1.014
5	92700	94500	1.0471e-252	50.5491	0.465374	93977	94218	Confirmed ARS	ARS508	proARS508
5	138800	139900	1.5563e-45	18.73	1.20609
5	145100	146400	3.5145e-183	39.76	0.365694	145539	145782	Confirmed ARS	ARS510	proARS510
5	173100	174700	0	54.41	0.339415	173636	173874	Confirmed ARS	ARS511	proARS511
5	212200	213100	4.1259e-115	25.11	0.0219036	212381	212630	Confirmed ARS	ARS512	proARS512
5	275700	276600	2.99154e-22	12.38	0.36859	275573	278877	Likely ARS
5	277600	278900	4.73703e-97	32.45	0.297202	278877		Likely ARS
5	286900	288700	0	94.17	1.06042	287504	287750	Confirmed ARS	ARS514	proARS514
5	304400	305600	1.52945e-26	18.25	0.943562
5	339900	342100	1.15818e-34	37.72	0.823966
5	352600	354300	8.2726e-294	55.28	0.878494	353504	353751	Confirmed ARS	ARS516	tRNAgluARS, proARS516
5	438700	439500	2.0308e-121	21.68	0.417897	438929	439178	Confirmed ARS	ARS518	proARS518
5	472800	473900	1.18881e-24	17.18	0.446225
5	498400	499700	0	63.87	0.537498	498417	499343	Confirmed ARS	ARS520	proARS520
5	549200	550200	1.93218e-89	22.74	0.506807	549560	549809	Confirmed ARS	ARS522	ARS501, proARS522
5	568400	570500	0	90.37	0.80093	569020	570085	Confirmed ARS	ARS523	proARS523
5	574500	576800	7.77674e-43	35.8781	0.571189	575573	576817	Dubious ARS
6	200	1700	3.71536e-22	16.58	0.791636	23	1527	Likely ARS
6	4800	6600	0	92.9	0.838462	5435	6155	Confirmed ARS	ARS600.1	ARS120; X-ARS, proARS600.1
6	7900	8500	6.32902e-20	7.9	0.257217
6	20200	21700	2.6093e-157	38	0.502105	19669	20826	Confirmed ARS	ARS600.4	proARS600.3
6	31500	33800	0	69.1	0.578003	32472	32995	Confirmed ARS	ARS601	proARS601/proARS602
6	53100	54300	4.13346e-32	19.24	1.08212	51814	55080	Dubious ARS
6	68400	69100	4.10212e-44	11.07	0.622403	68690	68869	Confirmed ARS	ARS603	proARS603
6	75400	76000	6.17735e-37	10.42	1.3714
6	96200	97600	2.06175e-23	18.71	0.854798	95000	103000	Dubious ARS
6	101500	102400	5.69037e-24	11.24	0.782311	103000		Dubious ARS
6	104800	105800	1.08503e-23	13	0.935658
6	118000	119100	1.0436e-143	28.2	0.341489	118631	118952	Confirmed ARS	ARS603.5	proARS603.5
6	127400	128600	5.0408e-101	25.6	0.0723168	127745	128066	Confirmed ARS	ARS604
6	135400	137600	0	85.2	0.463789	135979	136080	Confirmed ARS	ARS605	proARS605
6	167500	168200	2.30957e-30	10.21	0.664806	167606	168041	Confirmed ARS	ARS606	proARS606
6	182200	182900	9.8797e-20	9.85	0.847716
6	198200	200300	0	90.59	0.626312	199382	199493	Confirmed ARS	ARS607	proARS607
6	255800	258400	0	89.03	0.857313	256263	256418	Confirmed ARS	ARS609	proARS609
6	267800	270000	0	67.18	0.670289	269404	270022	Confirmed ARS	ARS610	proARS610
7	200	3000	0	65.426	1.03706	23	778	Dubious ARS
7	4400	7000	1.13542e-29	34.248	0.977282	6261	8789	Likely ARS
7	17100	18800	0	60.32	0.751375	19624		Likely ARS
7	63900	65100	6.6078e-165	34.05	0.368576	64279	64528	Confirmed ARS	ARS702	proARS702
7	111600	112900	4.2495e-231	40.4	0.556596	112080	112319	Confirmed ARS	ARS704	proARS704
7	162500	164300	2.8562e-184	46.57	0.287379	163180	163447	Confirmed ARS	ARS707	proARS707
7	285200	286600	3.728e-252	44.29	0.629487	285951	286246	Confirmed ARS	ARS714	proARS714
7	293900	295400	3.01047e-32	21.69	0.566621
7	346000	346600	4.11747e-24	9.66	1.07971
7	352400	353300	2.27826e-81	19.39	0.168841	352695	352917	Confirmed ARS	ARS716	proARS716
7	385600	389100	7.16052e-23	44.6	0.744229	388658	388892	Confirmed ARS	ARS717	proARS717
7	420700	422300	0	77	0.4405	421093	421342	Confirmed ARS	ARS718	proARS718
7	476700	478300	7.79515e-20	22.27	1.21374
7	479900	482600	1.35867e-34	46.28	1.33535	479993	482537	Likely ARS
7	484500	485700	0	62.6	0.709851	484932	485160	Confirmed ARS	ARS719	proARS719
7	508400	509700	0	44.92	0.242431	508729	508978	Confirmed ARS	ARS720	proARS720
7	517200	519000	7.97642e-30	23.48	0.90923
7	574600	575300	1.0083e-108	17.55	0.253466	574622	574916	Confirmed ARS	ARS722	proARS722
7	597300	598500	4.78919e-27	19.61	0.921979
7	599400	601200	4.34844e-35	30.7	0.930293
7	611000	611700	1.47738e-23	9.5	1.00737
7	649600	650500	1.45914e-27	15.12	0.758341
7	659200	660800	0	57.51	0.418884	659809	660054	Confirmed ARS	ARS727	proARS727
7	714700	715600	1.88335e-33	14.48	-0.111878	715273	715556	Confirmed ARS	ARS728	proARS728
7	740600	741800	1.07478e-23	16.44	0.951946	735570	750570	Dubious ARS
7	776000	778400	5.0432e-107	43.06	0.508315	777967	778216	Confirmed ARS	ARS729	proARS729
7	798700	800000	3.9762e-40	21.9	0.889041	797096	812096	Dubious ARS
7	834300	835500	5.0281e-201	36.02	0.29206	834492	834736	Confirmed ARS	ARS731	proARS731
7	851100	852200	5.17836e-41	18.92	0.91649
7	876700	877800	9.72209e-21	13.3368	1.0574
7	882500	883900		27.82	1.0898	882813	883747	Likely ARS
7	887800	889000	9.7191e-212	36.36	0.360286	888350	888599	Confirmed ARS	ARS731.5	ARS737
7	906200	908700	6.69326e-43	44.33	1.02459
7	970900	972600	3.92666e-30	22.68	1.09637
7	977400	978300	5.14637e-37	14.0333	0.357022	977730	977979	Confirmed ARS	ARS733	proARS733
7	998600	1000100	2.4057e-188	38.92	0.521862	999448	999695	Confirmed ARS	ARS734	proARS734
7	1001000	1002300	3.54647e-42	24.56	1.20643	1000998	1003052	Likely ARS		proARS735
7	1057700	1058600	9.5659e-41	15.54	0.829472
7	1063200	1064600	1.3653e-147	32.3	0.527086	1064852		Likely ARS
7	1080100	1080800	3.39917e-22	8.97	0.719722
7	1082700	1084500	0	92.32	0.837108	1082959	1084336	Confirmed ARS	ARS131a	X-ARS, proARS736
7	1088400	1090800	4.8214e-53	35.64	0.57713	1089548	1090902	Likely ARS
8	200	2600	5.77613e-55	36.12	0.622523	23	1245	Dubious ARS
8	4900	6600	0	90.1177	0.787082	5158	6168	Confirmed ARS	ARS131n	X-ARS, proARS801
8	7200	9500	0	69.02	0.545287	7534	7782	Confirmed ARS	ARS802	proARS802
8	11600	12500	2.79718e-20	10.6385	0.694045
8	36600	38100	9.54646e-31	20.22	0.698406
8	45100	46500	4.3491e-151	37.1	0.419407	45113	47112	Likely ARS		proARS804
8	52100	52700	2.79718e-20	8.35	0.929341
8	63600	65600	2.3791e-231	49.39	0.411459	64255	64489	Confirmed ARS	ARS805	SPO11, proARS805
8	89000	89500	1.5133e-25	7.88	-0.161168	87472	89452	Dubious ARS
8	116100	116700	4.09573e-67	12.8216	0.665756	115683	117257	Likely ARS		proARS806
8	122900	123500	3.66676e-39	11.86	0.688135
8	133000	134400	0	43.23	0.664162	133347	133591	Confirmed ARS	ARS807
8	168000	169400	3.1694e-155	35.27	0.216409	168531	168773	Confirmed ARS	ARS809	proARS809
8	175700	176700	1.46222e-21	13.66	1.13763
8	244600	246400	6.5106e-294	56.16	0.549349	245719	245968	Confirmed ARS	ARS813	proARS813
8	296700	298100	4.6181e-271	40.7	0.808469	296233	298222	Likely ARS		proARS815
8	359300	360400	1.8899e-161	29.99	0.488094	358953	360647	Likely ARS		proARS816
8	391900	392800	4.9927e-214	29.56	0.161028	392148	392391	Confirmed ARS	ARS818	proARS818
8	447000	448400	2.2994e-274	51.63	0.345706	447619	447853	Confirmed ARS	ARS820	proARS820
8	451400	452900	1.18515e-68	33.55	1.09389	451493	453397	Likely ARS
8	471200	472500	1.19452e-35	20.57	1.20515
8	497700	498400	1.79687e-27	10.01	0.745255
8	501700	502300	2.17239e-72	14.6956	0.200622	501751	501992	Confirmed ARS	ARS822	proARS822
8	535000	536500	0	58.23	0.290572	534753	537517	Likely ARS
8	554400	557000	0	93.02	0.87078	555996	556327	Confirmed ARS	ARS824	X-ARS, proARS824
8	559800	562500	1.14766e-53	42.13	0.639245	561013	562587	Dubious ARS
9	200	3000	1.44663e-62	41.77	0.658421	23	2400	Dubious ARS
9	7100	9800	0	111.1	0.839295	6794	9748	Likely ARS		proARS902
9	22900	27100	3.38363e-38	73.42	1.14699
9	32900	34600	1.6789e-273	59.47	0.556751	32509	34859	Likely ARS		proARS905
9	52300	53700	7.67985e-21	17.96	0.732806
9	55300	55900	2.11744e-27	8.58	0.834499
9	73600	74700	2.0659e-109	26.6862	0.158546	72923	75194	Likely ARS		proARS907
9	105900	106500	1.09331e-28	8.29	0.404101	105821	106048	Confirmed ARS	ARS909	proARS909
9	124600	125700	4.77817e-22	15.19	0.314085
9	128200	129700	1.06942e-39	24.71	1.09875
9	135800	136900	4.33512e-98	23.13	-0.0462614	136094	136335	Confirmed ARS	ARS911	proARS911
9	174600	176700	9.38844e-78	41.7265	0.480285	175034	175355	Confirmed ARS	ARS912	proARS912
9	178300	179100	2.55331e-22	10.43	0.779277
9	189500	190400	1.46631e-85	20.18	0.228524	189523	190747	Likely ARS
9	213600	215400	1.1266e-103	33.98	0.668072	214675	214826	Confirmed ARS	ARS913	ARS901, proARS913
9	244800	249100	0	182.9	0.758851	245694	245932	Confirmed ARS	ARS913.5	ARS923
9	269200	270300	1.8529e-28	15.2	0.591747
9	310300	311400	1.3107e-227	30.97	0.352896	311477		Likely ARS	proARS916
9	341100	342900	0	67.8	0.696731	341853	342096	Confirmed ARS	ARS919	proARS919
9	356800	357700	9.2842e-161	24.58	0.056581	357156	357393	Confirmed ARS	ARS920	proARS920
9	365600	366400	1.31508e-34	13.28	0.603163
9	368100	369000	1.56642e-35	13.64	0.531981
9	382800	383700	2.87484e-44	14.23	0.742797
9	406200	407500	4.10494e-87	25.58	0.243522	405633	407617	Likely ARS
9	411100	412700	0	63.02	0.255293	411817	412053	Confirmed ARS	ARS922	proARS922
9	422100	422800	3.78431e-29	10.43	0.667306
9	433600	434500	1.24886e-25	11.2	0.720104	434257		Likely ARS
9	438000	439800	0	96.96	0.819204	437553	439847	Likely ARS
10	200	3000	7.25574e-65	41.6153	0.608427	64	577	Confirmed ARS	ARS1001	Y'-ARS, proARS1001
10	7100	9500	0	108.03	0.866519	7444	7943	Confirmed ARS	ARS1002	X-ARS, proARS1002
10	23400	24300	2.18734e-41	15.03	0.114301	23661	24158	Confirmed ARS	ARS1004	proARS1004
10	66700	68600	7.6795e-153	40.42	1.02665	67467	67949	Confirmed ARS	ARS1005	proARS1005
10	98300	100700	8.4094e-203	52.9	0.465409	99359	99796	Confirmed ARS	ARS1006	proARS1006
10	113100	114700	0	56.89	0.508998	113226	113828	Confirmed ARS	ARS1007	proARS1007
10	120500	122900	1.0503e-47	44.67	0.964182	120693	121777	Dubious ARS
10	139300	139900	8.85492e-23	8.1	1.61605
10	204100	205100	0	39.95	1.0005	203729	204614	Confirmed ARS	ARS1008	proARS1008
10	227900	229400	5.5392e-190	36.42	0.63736	228248	228740	Confirmed ARS	ARS1009	proARS1009
10	290000	290600	2.50657e-25	9.37	1.15688
10	336300	337800	7.9634e-295	50.76	0.981678	336976	337225	Confirmed ARS	ARS1011	proARS1011
10	338300	339300	7.52826e-28	16.18	0.885368
10	374300	375700	0	55.11	0.54618	374575	374818	Confirmed ARS	ARS1012	proARS1012
10	381500	383100	1.21361e-29	23.13	1.2888
10	416600	418300	0	66.69	0.500619	416888	417134	Confirmed ARS	ARS1014	proARS1014
10	426100	427000	2.95011e-21	12.36	0.62055
10	442100	443900	0	64.73	0.806581	442248	442658	Confirmed ARS	ARS1015	proARS1015
10	453100	454600	7.82358e-38	22.74	1.04617	454276	455248	Confirmed ARS	ARS1016
10	464400	466000	4.11329e-32	25.16	0.997372
10	519500	521600	1.38563e-50	38.86	1.01074
10	539800	541000	2.0309e-202	33.8835	0.55281	540239	540474	Confirmed ARS	ARS1018	proARS1018
10	577300	578300	4.17978e-34	15.37	1.05856
10	612200	613400	2.0538e-224	38.3	0.321799	612542	612975	Confirmed ARS	ARS1019	proARS1019
10	621700	623100	1.84202e-39	22.01	0.855975
10	647700	649300	4.52293e-28	23.54	1.12404
10	683300	684600	0	63.65	1.00338	683328	683817	Confirmed ARS	ARS1021	ARS121, proARS1021
10	711400	713700	3.48532e-23	28.36	0.488602	711590	711837	Confirmed ARS	ARS1022	proARS1022
10	742300	742800	8.00419e-26	6.91	1.05644
10	743900	745600	0	95.79	0.834951	744102	744703	Confirmed ARS	ARS1025	proARS1025
11	200	2800	0	109.73	0.833774	23	2746	Likely ARS		proARS1101
11	54800	56700	0	63.91	0.45027	55670	55917	Confirmed ARS	ARS1103	proARS1103
11	68200	68900	6.96477e-28	10.7853	0.432502
11	97600	98900	1.1151e-242	40.56	0.636834	98329	98568	Confirmed ARS	ARS1104.5	ARS1125
11	152700	153500	8.93928e-71	17.19	0.54683	152934	153173	Confirmed ARS	ARS1106	proARS1106
11	163500	164500	2.29585e-43	17.77	1.29713	163723	164287	Dubious ARS
11	169300	170800	2.31594e-32	23.7	0.867089
11	212700	214000	0	54.39	0.321015	213080	213385	Confirmed ARS	ARS1106.7	ARS1127
11	256800	258300	0	65.93	0.497904	256478	258327	Likely ARS		proARS1107
11	279000	279800	1.63192e-32	12.4	0.106125
11	326000	327100	6.98711e-73	28.84	1.21463	326153	327067	Likely ARS
11	329000	330100	2.5525e-165	31.45	0.56566	329322	329571	Confirmed ARS	ARS1109	proARS1109
11	363400	364000	2.8217e-20	9.47	0.691658
11	387700	389200	0	59.83	0.587832	388607	388902	Confirmed ARS	ARS1112	proARS1112
11	416400	417600	0	44.17	0.319221	416822	417055	Confirmed ARS	ARS1113	proARS1113
11	447300	448800	0	66.9	0.816891	447657	447892	Confirmed ARS	ARS1114	proARS1114
11	456600	457600	7.84231e-21	12.67	0.26914	454453	459197	Confirmed ARS	ARS1114.5
11	462100	464500	0	78.11	0.390963	462033	463697	Likely ARS		proARS1115
11	515100	517200	6.2871e-186	61.81	0.839832	516653	516902	Confirmed ARS	ARS1116	proARS1116
11	519100	520400	9.86728e-48	24.26	0.95136	519333	520547	Likely ARS
11	524100	524700	3.82503e-21	7.8985	0.37199
11	525000	526100	8.4729e-23	15.19	0.762895
11	581000	582700	0	64.61	0.867929	581468	581706	Confirmed ARS	ARS1118	proARS1118
11	611400	612600	5.5968e-100	26.92	0.4974	611874	612107	Confirmed ARS	ARS1120	proARS1120
11	633500	634200	7.62074e-43	12.5	0.1104	632003	634377	Likely ARS		proARS1122
11	641400	643100	0	85.5	0.948239	642355	642602	Confirmed ARS	ARS1123	proARS1123
11	658200	660100	4.95866e-83	40.96	0.895752	658278	666417	Likely ARS		proARS1124
11	662300	666300	0	119.74	0.889013	666417		Likely ARS	proARS1124
12	200	2800	2.53103e-57	39.19	0.572619	23	2077	Likely ARS
12	5700	8600	3.23145e-60	41.4206	0.631322	5107	7993	Likely ARS
12	11300	13800	0	112.52	0.874132	10642	13971	Likely ARS		proARS1201
12	21100	21700	5.53582e-23	8.67	0.983852
12	30700	32300	1.3312e-265	50.41	0.401485	28749	32505	Likely ARS		proARS1202
12	88900	92200	0	80.96	0.60064	91417	91659	Confirmed ARS	ARS1206	proARS1206
12	95500	97400	2.25307e-56	37.18	1.03066
12	106200	107400	6.49304e-23	16.58	0.658756
12	139300	140300	1.33669e-33	15.08	0.601086	139293	140447	Likely ARS		proARS1207
12	156300	157200	2.6541e-156	23.71	0.421341	156646	156883	Confirmed ARS	ARS1209	proARS1209
12	197000	198100	3.8079e-21	13.67	0.168983	197913	199417	Dubious ARS
12	199000	200200	4.2673e-34	19.87	1.06744	199417		Dubious ARS
12	222300	223100	3.14758e-37	12.91	0.626363	221983	223287	Likely ARS		proARS1210
12	230900	231700	2.40411e-34	12.13	0.364721	231179	231422	Confirmed ARS	ARS1211	proARS1211
12	232400	234100	4.04391e-41	29.39	1.17889
12	242600	245400	0	86.41	0.583449	242693	246032	Likely ARS
12	252400	253000	4.02134e-23	8.58	1.04429
12	257700	259300	2.16226e-41	25.76	0.773146
12	283100	283700	6.12303e-50	12.24	1.15033	285304		Likely ARS
12	288900	290800	0	59.46	0.639155	289220	289469	Confirmed ARS	ARS1212	proARS1212
12	369000	370300	1.26663e-63	23.4512	1.32062
12	372400	373700	4.54597e-73	25.24	0.540555	373156	373400	Confirmed ARS	ARS1213	proARS1213
12	412100	413500	3.8202e-283	41.04	0.22905	412668	412897	Confirmed ARS	ARS1215	proARS1215
12	449900	469200	0	551.43	0.6654	450485	450726	Confirmed ARS	ARS1216	proARS1216
12	471700	472800	2.21486e-45	15.8	1.11013
12	481900	482400	1.10565e-33	9.31	0.937701
12	485500	486100	5.68443e-32	9.56	1.04289
12	488600	490600	8.75845e-60	32.09	0.84545
12	512500	513800	5.5038e-195	37.1	0.791644	512868	513117	Confirmed ARS	ARS1217	proARS1217
12	515500	516600	6.21293e-31	16.78	1.00119
12	552800	553500	8.12036e-25	10.69	0.666043
12	602700	603800	4.4279e-244	34.23	0.6357	602938	603155	Confirmed ARS	ARS1218	proARS1218
12	610700	611600	1.04638e-22	11.17	1.01932
12	622600	623100	6.80882e-20	6.47	0.00249203	622103	623937	Likely ARS		proARS1219
12	659200	660400	2.7392e-234	36.97	0.610873	659823	660072	Confirmed ARS	ARS1220	proARS1220
12	663200	664700	7.87341e-26	20.58	1.0402
12	729100	731000	2.9652e-258	58.88	0.713281	729123	732237	Likely ARS		proARS1222
12	732700	734100	5.4704e-30	20.33	0.693845
12	735000	737400	4.60517e-44	43.7997	1.00206
12	744700	746000	3.8503e-142	30.57	0.435394	744942	745179	Confirmed ARS	ARS1223	proARS1223
12	793600	795100	0	54.54	0.761826	794020	794269	Confirmed ARS	ARS1226	proARS1226
12	802800	804800	4.44056e-21	25.7	0.644978
12	810100	811400	5.6221e-26	18.25	1.31233
12	811500	813700	8.9269e-23	22.85	1.28387
12	821700	822500	6.91643e-39	13.88	0.50071	821403	823002	Likely ARS		proARS1227
12	837800	839400	3.5932e-128	43.9637	1.09226	838103	839237	Dubious ARS
12	888100	889900	4.9331e-258	54.28	0.353618	888569	888810	Confirmed ARS	ARS1227.5	ARS1238
12	903900	904500	5.83338e-25	8.82	0.910431
12	920100	921500	2.48574e-23	18	1.26222	921493		Dubious ARS	proARS1228
12	927300	928900	1.9916e-289	49.85	0.34673	927043	929292	Likely ARS		proARS1229
12	1003400	1004300	5.49449e-87	19.11	1.01936
12	1012800	1014200	2.55921e-43	25.14	0.562485	1013789	1014017	Confirmed ARS	ARS1233	proARS1233
12	1023700	1024900	6.6701e-225	37.07	0.376503	1023967	1024207	Confirmed ARS	ARS1234	proARS1234
12	1059400	1060700	3.07026e-70	21.63	0.317768	1058848	1060802	Likely ARS		proARS1235
12	1062600	1065100	0	109.63	0.875308	1062398	1065752	Likely ARS		proARS1236
12	1069100	1071800	1.98154e-46	38.15	0.628429	1070198	1071952	Likely ARS		proARS1237
12	1075800	1078100	3.89067e-51	33.2772	0.579365	1077198	1078102	Dubious ARS
13	200	2700	5.46975e-57	36.8163	0.578005	23	1261	Likely ARS
13	5600	7400	0	94.83	0.790035	4983	7702	Likely ARS		proARS1301
13	24000	25600	1.99664e-63	36.54	1.01232	23852	25691	Dubious ARS
13	27900	29800	8.53522e-39	31.47	0.69259
13	30700	32700	0	75.22	0.45586	31687	31935	Confirmed ARS	ARS1303	proARS1303
13	38400	40800	3.5519e-244	59.47	0.607608	38724	40444	Likely ARS		proARS1304
13	68600	69500	3.24123e-26	12.7	1.21604
13	70500	73600	5.59593e-51	45.19	0.667324	73495	74614	Dubious ARS
13	136300	138000	0	65.22	0.824747	137299	137548	Confirmed ARS	ARS1307	proARS1307
13	158400	159800	0	66.11	0.397822	158563	159797	Likely ARS
13	162100	163000	5.14418e-36	14.06	1
13	170800	171400	7.36734e-26	9.16	1.26528
13	183400	184300	4.0995e-113	20.5	0.813171	183793	184037	Confirmed ARS	ARS1308	proARS1308
13	219400	220900	6.17886e-46	23.01	0.806649
13	250000	250900	6.3833e-43	14.86	0.856504
13	262500	263700	7.8274e-271	36.1	0.332687	263062	263296	Confirmed ARS	ARS1309	proARS1309
13	286400	287400	4.8406e-277	36.83	0.464567	286782	287067	Confirmed ARS	ARS1310	proARS1310
13	370600	371600	4.8545e-264	36.8	0.527717	370976	371221	Confirmed ARS	ARS1312	proARS1312
13	432500	433500	1.2992e-102	24.49	0.467256	431453	433827	Likely ARS		proARS1315
13	476100	477000	6.05101e-20	11.7	0.520443
13	484200	486100	8.95588e-47	35.68	0.95824
13	502800	504200	0	44.36	0.571179	504197		Likely ARS	proARS1319
13	507200	508700	1.15398e-27	19.52	0.669673
13	511400	511900	1.27514e-21	7.38	1.02846
13	535200	536900	0	59.47	1.06676	535595	535843	Confirmed ARS	ARS1320	proARS1320
13	554100	556400	5.899e-131	51.91	0.534607	553563	556237	Likely ARS		proARS1322
13	611000	611900	4.13417e-74	18.47	0.138603	611273	611488	Confirmed ARS	ARS1323	proARS1323
13	632500	634900	4.22459e-84	44.71	0.800688	634479	634714	Confirmed ARS	ARS1324	proARS1324
13	637800	640600	4.40611e-22	36.49	0.676592
13	649000	649800	4.25782e-44	12.67	-0.0789266	649307	649551	Confirmed ARS	ARS1325	proARS1325
13	657600	658400	1.29218e-22	11.48	0.450348
13	672000	673800	1.2712e-49	30.97	0.786241
13	688200	689500	2.12577e-75	25.36	0.482256	687903	689917	Likely ARS		proARS1326
13	757400	759000	2.2953e-134	42.62	0.702252	758222	758470	Confirmed ARS	ARS1327	proARS1327
13	804600	805900	1.5819e-185	36.91	0.00424364	805116	805338	Confirmed ARS	ARS1329	proARS1329
13	814900	815900	1.2058e-89	21.7734	0.353791	815341	815567	Confirmed ARS	ARS1330	proARS1330
13	817000	818500	8.9362e-21	19.88	0.433454
13	819200	819900	1.8537e-32	11.52	0.984375
13	859600	860600	2.00274e-23	13.9	0.97482
13	862000	863400	1.41579e-25	19.51	0.850906
13	887300	888700	1.72433e-21	18.06	1.46124
13	897300	898900	0	68.32	0.876025	897804	898040	Confirmed ARS	ARS1332	proARS1332
13	916700	917400	8.20689e-34	10.59	0.84136
13	921800	924300	0	78.48	0.800785	922023	924397	Likely ARS		proARS1335
14	200	2800	1.55075e-50	36.24	0.63797	50	2241	Likely ARS
14	6600	8500	0	94.59	0.822689	6282	10914	Likely ARS		proARS1402
14	28400	29100	6.92262e-33	11.3	0.0902655	28467	28699	Confirmed ARS	ARS1405	proARS1405
14	33500	34100	6.76107e-22	8.64	0.600694	43756		Dubious ARS
14	61000	62500	0	50.46	0.53805	61597	61894	Confirmed ARS	ARS1406	proARS1406
14	89100	90400	0	51.43	0.623397	89528	89802	Confirmed ARS	ARS1407	proARS1407
14	117600	118800	2.58831e-39	22.2	0.684415
14	169400	170200	2.0579e-158	24.11	0.231207	169566	169804	Confirmed ARS	ARS1411	proARS1411
14	195500	197800	7.2039e-234	65.82	0.680475	196055	196291	Confirmed ARS	ARS1412	proARS1412
14	250300	251000	1.60554e-63	15.08	0.221319	250259	250506	Confirmed ARS	ARS1413	proARS1413
14	252800	254100	3.91e-26	15.97	1.02254	252383	254147	Likely ARS
14	279300	280700	0	48.59	0.790286	279875	280108	Confirmed ARS	ARS1414	proARS1414
14	321500	322800	2.7172e-284	41.94	0.728072	321917	322210	Confirmed ARS	ARS1415	proARS1415
14	372500	373600	3.37859e-63	22.77	1.01757
14	411900	412900	2.6352e-213	31.55	0.522345	412263	412493	Confirmed ARS	ARS1417	proARS1417
14	424900	426400	5.03671e-30	19.98	1.04454
14	448700	450600	0	62.37	0.782106	449343	449588	Confirmed ARS	ARS1419	proARS1419
14	498500	500700	0	76.07	1.00951	498987	499232	Confirmed ARS	ARS1420	proARS1420
14	501800	502800	3.37687e-36	16.97	1.01827
14	517700	518900	3.5595e-43	19.43	0.868245	512969	519969	Likely ARS
14	545600	546700	3.2732e-133	27.6933	0.33642	545966	546201	Confirmed ARS	ARS1421	proARS1421
14	560600	561800	4.86819e-91	27.99	0.537174	561106	561384	Confirmed ARS	ARS1422	proARS1422
14	608900	609900	4.74207e-35	16.58	0.490251	609458	609706	Confirmed ARS	ARS1424	proARS1424
14	618600	619500	1.66819e-21	12.83	0.8106
14	629500	630900	3.68788e-22	18.43	0.81859
14	635300	636400	7.3738e-183	33.28	0.500843	635660	635901	Confirmed ARS	ARS1426	proARS1426
14	660300	661200	1.85413e-35	15.17	0.889914	663876		Dubious ARS
14	690800	692000	7.33086e-59	20.25	0.269883	691482	691727	Confirmed ARS	ARS1427	proARS1427
14	737500	739600	0	77.69	0.751963	737003	740237	Likely ARS
14	763600	765000	2.3131e-164	39.33	0.603865	763353	765237	Likely ARS		proARS1429
14	777300	778300	9.4788e-29	14	0.893167
14	781600	784100	0	110.821	0.898326	781453	784287	Likely ARS		proARS1430
15	200	2300	0	82.16	0.839112	23	2646	Likely ARS		proARS1503
15	10400	12400	7.3911e-165	49.3158	0.595752	9761	12672	Likely ARS		proARS1504
15	19000	20300	7.64963e-24	18.94	0.364293	18367	20227	Likely ARS		proARS1506
15	28800	32600	9.50858e-65	78.37	0.936234
15	72000	73500	1.6277e-218	44.85	0.494629	72636	72872	Confirmed ARS	ARS1507	proARS1507
15	84800	86100	2.0604e-127	34.88	0.453185	85195	85444	Confirmed ARS	ARS1508	proARS1508
15	113700	115000	2.02078e-84	27.8	0.641007	113843	114084	Confirmed ARS	ARS1509	proARS1509
15	159400	160600	9.10628e-51	21.82	1.28918	159203	160567	Dubious ARS
15	166300	167700	9.4204e-264	51.17	0.652726	166974	167220	Confirmed ARS	ARS1510	proARS1510
15	227400	227900	2.14791e-27	8.88	0.363739	223471	230471	Likely ARS
15	276800	278300	0	65.93	0.431984	277529	277778	Confirmed ARS	ARS1511	proARS1511
15	308300	309900	6.3332e-213	39.23	0.141218	308463	310157	Likely ARS		proARS1512
15	336700	338400	4.4331e-237	58.7	0.829983	337279	337528	Confirmed ARS	ARS1513	proARS1513
15	347900	348800	8.79029e-34	14.5327	0.194733	347633	348862	Dubious ARS
15	436500	437500	1.0918e-192	35.63	0.432501	436732	436966	Confirmed ARS	ARS1513.5	ARS1501
15	444900	445900	1.93733e-30	16.26	1.46617	444823	446117	Likely ARS
15	447500	448400	2.28947e-26	13.7	0.594035
15	480100	481500	1.64497e-28	20.39	1.25159
15	496900	497600	1.68205e-32	11.4868	-0.104467	496203	498207	Likely ARS
15	566300	567300	7.6588e-114	25.76	0.766693	566409	566643	Confirmed ARS	ARS1516	ADE2, proARS1516
15	600700	601700	3.1495e-266	37.86	0.257399	600885	600960	Confirmed ARS	ARS1517	ARS1502, proARS1517
15	620500	621300	1.10945e-21	11.33	1.47749
15	656000	657300	5.9286e-245	44.7	0.655034	656632	656876	Confirmed ARS	ARS1519	proARS1519
15	681000	682000	1.4851e-212	34.53	0.543875	680823	683197	Likely ARS		proARS1520
15	723100	724900	5.3817e-58	33.21	1.23577
15	729600	730200	3.9992e-21	9.17	0.940022	729739	729969	Confirmed ARS	ARS1521	proARS1521
15	766000	767300	1.93416e-28	21.89	0.39196	766617	766862	Confirmed ARS	ARS1523	proARS1522
15	782500	784000	0	56.86	0.655706	783344	783563	Confirmed ARS	ARS1524	proARS1524
15	854600	855200	4.6908e-43	12.68	0.237382	854173	856027	Likely ARS		proARS1525
15	874100	874800	5.70688e-43	12.67	0.346651	874190	874434	Confirmed ARS	ARS1526	proARS1526
15	883100	884000	5.67087e-24	12.98	1.07107
15	899200	900100	3.5723e-46	16.95	0.0878302	898603	900567	Likely ARS
15	907700	908900	0	56.09	0.946765	908288	908537	Confirmed ARS	ARS1528	proARS1528
15	986900	988100	2.50233e-38	20.89	0.308298
15	1053400	1054100	1.83176e-27	11.74	0.979557	1053490	1053901	Confirmed ARS	ARS1529.5
15	1082500	1084800	0	96.03	0.868965	1085252		Likely ARS		proARS1530
15	1088900	1091200	1.20172e-45	36.91	0.580362	1089998	1091252	Likely ARS
16	200	2300	2.3335e-43	31.11	0.611646	23	2150	Dubious ARS
16	6500	8200	0	87.16	0.916131	6778	8439	Confirmed ARS	ARS1601	proARS1601
16	8300	8900	1.2248e-22	7.46	0.635493	8439		Confirmed ARS	ARS1601	proARS1601
16	42000	44000	5.1914e-247	57.52	0.587182	42976	43212	Confirmed ARS	ARS1604	proARS1604
16	47900	48900	3.81549e-20	14.82	0.54705
16	72800	74600	5.8026e-125	39.97	0.373528	73038	73283	Confirmed ARS	ARS1605	proARS1605
16	115500	117100	2.6513e-254	52.86	0.420606	116505	116765	Confirmed ARS	ARS1607	proARS1607
16	161800	163000	4.28815e-54	24.09	0.742632	161693	163447	Likely ARS		proARS1608
16	185500	186200	1.94322e-21	9.59	0.950991
16	259700	260700	3.46953e-43	16.28	0.994472
16	289200	290200	5.0038e-134	28.02	0.447537	289483	289704	Confirmed ARS	ARS1614	proARS1614
16	297700	299000	2.22724e-30	18.99	0.744076	297813	299287	Dubious ARS
16	377200	377900	3.3772e-61	16.11	0.758535	376723	377937	Likely ARS
16	383700	385700	0	72	0.464539	384536	384784	Confirmed ARS	ARS1618	proARS1618
16	389000	389700	3.95423e-22	9.96	1.27008
16	413900	414900	1.26156e-21	13.32	1.10715	414032	416072	Confirmed ARS	ARS1618.5
16	417300	418800	1.7117e-261	46.42	0.542008	418132	418359	Confirmed ARS	ARS1619	proARS1619
16	427800	428300	7.86795e-23	8.23	-0.151883	427273	428757	Dubious ARS
16	432900	434000	1.2248e-22	16.99	0.804354
16	439300	439800	1.057e-22	7.59	-0.255599	439113	441372	Likely ARS
16	453900	454900	7.06433e-89	23.31	0.305338	453658	454627	Likely ARS
16	456000	457400	1.72479e-64	24.95	0.6973	456557	456805	Confirmed ARS	ARS1620.5	ARS1633
16	510800	512400	0	63.96	0.648061	511619	511940	Confirmed ARS	ARS1621	proARS1621
16	550600	551500	9.44995e-22	13.25	0.763981
16	553100	553900	1.17278e-38	13.5668	0.277885	552403	554287	Likely ARS
16	563200	564600	2.4913e-178	40.52	0.252392	563822	564061	Confirmed ARS	ARS1622	proARS1622
16	584100	585100	5.46426e-58	21.36	0.452226	583493	585147	Likely ARS
16	633300	634500	7.1384e-261	41.66	0.54281	633868	634117	Confirmed ARS	ARS1623	proARS1623
16	642400	643400	1.9527e-29	16.6	0.900342
16	645900	646900	2.46188e-31	16.08	1.051
16	684100	684700	1.26156e-21	7.97	0.375157	684383	684632	Confirmed ARS	ARS1624	proARS1624
16	693000	696900	0	108.187	0.8888	695432	695681	Confirmed ARS	ARS1625	proARS1625
16	700700	702200	1.0853e-69	33.64	1.09602	700763	701932	Dubious ARS
16	776500	777800	0	46.95	0.573589	776921	777152	Confirmed ARS	ARS1626.5	ARS1635
16	818800	819900	1.0358e-209	32.68	0.640826	819153	819393	Confirmed ARS	ARS1627	proARS1627
16	822800	824500	8.77109e-59	32.66	1.05481	822993	825387	Likely ARS
16	880200	881600	1.6994e-306	46.94	0.631443	880854	881102	Confirmed ARS	ARS1630	proARS1630
16	919700	920500	4.38771e-20	11.97	0.835422
16	922000	922800	2.29682e-33	14.08	0.911222
16	927800	928100	3.41118e-25	6.31
16	932800	933500	1.3044e-56	15.3	0.0176471	932976	933223	Confirmed ARS	ARS1631	proARS1631
16	941400	943000	0	74.32	0.461334	940923	943157	Likely ARS		proARS1632
16	945500	948000	5.9665e-48	38.41	0.583442	946803	947997	Likely ARS
